# Supplementary material for: Urchin-like Ce/Tb co-doped GdPO4 hollow spheres for in vivo luminescence/X-ray bioimaging and drug delivery
Source: Royal Society of Chemistry journal article supplement (doi:10.1039/c4bm00158c), 2014-01-01
Supplement: c4bm00158c2.pdf [file c4bm00158c2.pdf]

SUPPORTING INFORMATION

**Urchin-like Ce/Tb co-doped GdPO<sub>4</sub> hollow spheres for  
*in vivo* luminescence/X-ray bioimaging and drug  
delivery**

**Zhigao Yi,<sup>a,b</sup> Wei Lu,<sup>c</sup> Chao Qian,<sup>a</sup> Tianmei Zeng,<sup>a</sup> Lingzhen Yin,<sup>a</sup> Haibo Wang,  
<sup>a,b</sup> Ling Rao,<sup>a,b</sup> Hongrong Liu,<sup>a</sup> Songjun Zeng<sup>\*,a</sup>**

*a* College of Physics and Information Science and Key Laboratory of Low-dimensional Quantum Structures and Quantum Control of  
the Ministry of Education, Hunan Normal University, Changsha, Hunan, People's Republic of China. Email: [songjunz@hunnu.edu.cn](mailto:songjunz@hunnu.edu.cn)

*b* Faculty of Materials, Optoelectronics and Physics, Key Laboratory of Low-dimensional Materials and Application Technology  
(Ministry of Education), Xiangtan University, Xiangtan 411105, People's Republic of China.

*c* Department of Applied Physics and Materials Research Center, The Hong Kong Polytechnic University, Hong Kong.

Movie S1. The 3D *in vivo* X-ray bioimaging of the GdPO<sub>4</sub>:Ce/Tb hollow spheres. The images were captured by the multimodal animal rotation system (MARS, per 10° ranging from 0 to 360°) and exported as a video at 5 frames per second.

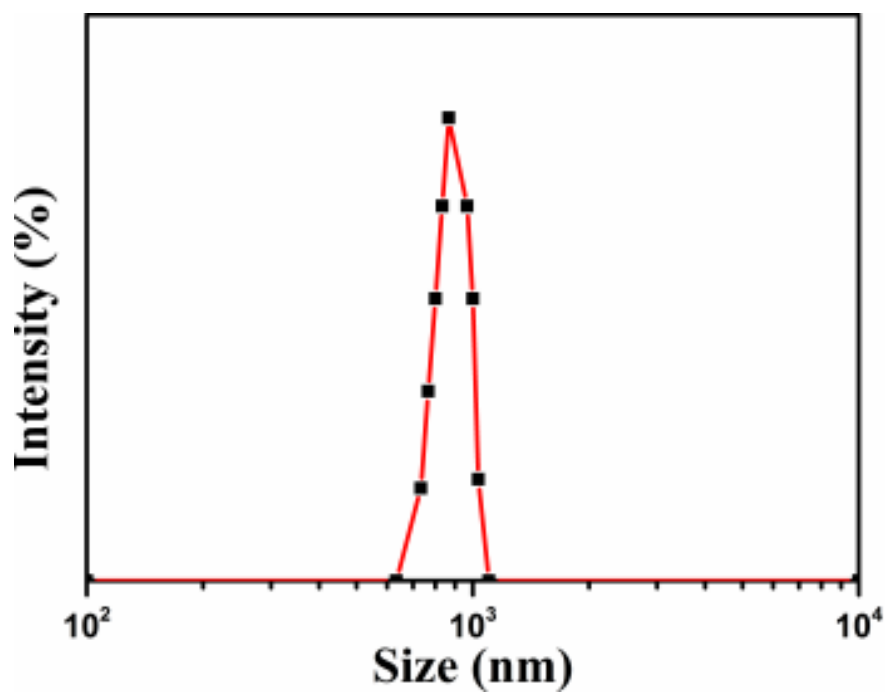

Figure S1. Diameter distribution determined by dynamic light scattering

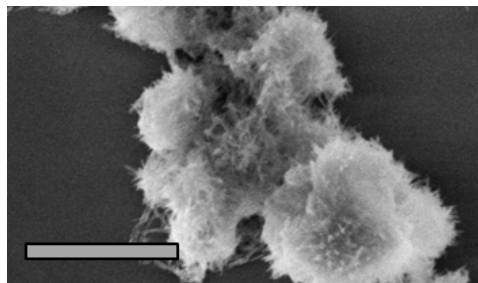

Figure S2. FE-SEM image of the  $\text{GdPO}_4:\text{Ce}/\text{Tb}$  hollow spheres after releasing the drug. The scale bar is 1000 nm.
